# Supplementary material for: Hemidesmosome-Related Keratin Filament Bundling and Nucleation
Source: MDPI journal article supplement (doi:10.3390/ijms22042130), 2021-02-21
Supplement: s1 [file s1]

## Supplementary video explanations

**Video S1.** Treatment of HaCaT keratinocytes with latrunculin B disrupts actin dynamics within a few minutes in a dose-dependent manner. The video presents time-lapse fluorescence microscopy of HaCaT cells producing mApple-Actin before and after addition of either 2  $\mu\text{M}$  or 1  $\mu\text{M}$  latrunculin B. The cells treated with the higher concentration show a stronger decrease in actin-dynamics and a pronounced disassembly of actin structures. Note that there are adjacent non- or weakly-transfected cells. The recordings show only bottom focal planes. The original resolution was downscaled in the video with a bicubic filter to preserve detail.

**Video S2.** Treatment of HaCaT keratinocytes with 20  $\mu\text{M}$  nocodazole stops microtubule dynamics instantaneously. The image series shows fluorescence recordings of EB3-GFP in HaCaT cells before and after addition of 20  $\mu\text{M}$  nocodazole. The drug was washed out after 10 min incubation, resulting in slow re-assembly of EB3-GFP positive microtubules in the cell periphery. The recording shows maximum intensity projections of lower focal planes ( $z = 0$  to 1.05  $\mu\text{m}$ ; 4 planes), and the signal was processed as annotated in the video.

**Video S3.** Simultaneous disruption of actin filaments (3  $\mu\text{M}$  latrunculin) and microtubules (20  $\mu\text{M}$  nocodazole) induces partial keratin network retraction, keratin filament bundling, and formation of new keratin filament bundles in the cell periphery near the cell bottom (compare recordings at  $z = 0$  nm with those at  $z = 700$  nm). The fluorescence images were recorded in HaCaT B10 cells producing fluorescent keratin 5-YFP.

**Video S4.** Treatment of HaCaT keratinocytes with latrunculin B disassembles focal adhesions, whereas nocodazole does not affect focal adhesions. The video shows time-lapse fluorescence recordings of paxillin-GFP and keratin 5-mCherry in HaCaT cells before and after addition of 3  $\mu\text{M}$  latrunculin B (top panels) or 20  $\mu\text{M}$  nocodazole (lower panels). The recordings show maximum intensity projections of lower focal planes ( $z = 0$  to 1.05  $\mu\text{m}$ ; 4 planes). The original resolution was downscaled in the video with a bicubic filter to preserve detail. In addition see corresponding Figure A4.

**Video S5.** Keratin network reorganization is independent of focal adhesions in the absence of actin filaments and microtubules. The image series shows the fluorescence of keratin 5-mCherry and talin-GFP in a HaCaT cell of a monolayer that was treated with 3  $\mu\text{M}$  latrunculin B and 20  $\mu\text{M}$  nocodazole. The recording shows maximum intensity projections of lower focal planes ( $z = 0$  to 1.05  $\mu\text{m}$ ; 4 planes) at original resolution. See corresponding Figure 5 for more details.

**Video S6.** Growing keratin filaments appear at nascent hemidesmosomes after actin and microtubule disruption. The image series shows the fluorescence of keratin 5-mCherry and integrin  $\beta 4$ -GFP in a HaCaT cell of a monolayer that was treated with 3  $\mu\text{M}$  latrunculin B and 20  $\mu\text{M}$  nocodazole. See annotations in the video and corresponding Figure 6 for more details.

**Video S7.** Keratin filaments are assembled at and interconnect hemidesmosomes. The image series shows the fluorescence of keratin 14-mCerulean and integrin  $\beta 4$ -YFP in a migrating HaCaT cell within a monolayer a few minutes after a scratch was induced. The recording shows the bottom confocal plane at original resolution with enlarged panels that were upsampled by bilinear filtering. See corresponding Figure 7 for more details.
